# Supplementary material for: Genetic Variability of Arabidopsis thaliana Mature Root System Architecture and Genome-Wide Association Study
Source: Front Plant Sci. 2022 Jan 28;12:814110. doi: 10.3389/fpls.2021.814110 (PMC8831901; doi:10.3389/fpls.2021.814110)
Supplement: Supplementary file 4 [file Table_1.XLSX]

## Sheet: Blad1
Supplementary Table 1: Geographical and climate data for selected 241 Arabidopsis accessions
name	ID GWAPP	country	latitude (EW)	longitude (NS)	country of origin	elevation	Temp Mean {C}	Precipitation sum {mm}
Aa-0	7000	Germany	50.9167	9.57073	DE	297	8.6	718.9
Ag-0	6897	France	45	1.3	FR	299	12.5	800
Agu-1	98000	Spain	41.32	-1.341	ES	1051	12.1	496.9
Ak-1	6987	Germany	48.068	7.626	DE	225	11.1	802.2
Alc-0	6988	Spain	40.31	-3.22	ES	817	14.8	414.5
Alst-1	6989	United Kingdom	54.8	-2.4333	UK	349	7.4	1183.2
Amel-1	6990	Netherlands	53.448	5.73	NL	0	10	783
An-1	6898	Belgium	51.2167	4.4	BE	11	11.1	807.8
Ang-0	6992	Belgium	50.3	5.3	BE	209	10.1	877.6
Ann-1	6994	France	45.9	6.13028	FR	453	8.6	1116.6
Ba-1	7014	United Kingdom	56.5459	-4.79821	UK	184	5.4	2955.9
Baa-1	7002	Netherlands	51.3333	6.1	NL	20	11	738
Bak-2	9118	Georgia	41.794	43.477	GE	1233	5.3	725.3
Bak-7	9122	Georgia	42.794	44.477	GE	2196	0.4	1113.6
Bay-0	6899	Germany	49	11	DE	530	9.4	653.8
Bch-1	7028	Germany	49.517	9.317	DE	346	10	649.1
Bd-0	7013	Germany	52.458	13.287	DE	54	10.3	551.6
Benk-1	7008	Netherlands	52	5.675	NL	20	10.3	789.1
Bla-1	8264	Spain	41.6833	2.8	ES	97	15.6	666
Blh-1	8265	Slovakia	48	19	SK	462	9.4	671.9
Boot-1	7026	United Kingdom	54.4	-3.2667	UK	90	9.1	2294.5
Bor-1	5837	Czech Republic	49.4013	16.2326	CZ	520	8.6	598.6
Bor-4	6903	Czech Republic	49.4013	16.2326	CZ	520	8.6	598.6
Br-0	6904	Czech Republic	49.2	16.6166	CZ	210	9.1	559.9
Bs-1	8270	Switzerland	47.5	7.5	CH	327	9.4	1134.2
Bsch-0	7031	Germany	50.0167	8.6667	DE	130	10.3	662.2
Bu-0	8271	Germany	50.5	9.5	DE	413	8.6	718.9
Bur-0	6905	Ireland	54.1	-6.2	UK	8	9.1	1172.4
C24	6906	Portugal	40.2077	-8.42639	PT	100	15.9	959.8
Can-0	8274	Spain	29.2144	-13.4811	ES	358	19.7	159.9
Cdm-0	9800	Spain	39.725	-5.744	ES	463	16.2	462.9
Chat-1	7071	France	48.0717	1.33867	FR	140	11.3	640.7
CIBC-17	6907	United Kingdom	51.4083	-0.6383	UK	71	10.4	781
CIBC-5	6730	United Kingdom	51.4083	-0.6383	UK	71	10.4	781
Cit-0	7075	France	43.3779	2.54038	FR	370	14.2	686
Cnt-1	7064	United Kingdom	51.3	1.1	UK	25	11.3	717.6
Col-0	6909	USA	38.3	-92.3	USA	207	13.8	1051.6
Com-1	7092	France	49.416	2.823	FR	40	12	680.8
Ct-1	6910	Italy	37.3	15	IT	33	18.3	564.6
Cvi-0	6911	Cape Verde islands	15.1111	-23.6167	CV	306	23	314.2
Da(1)-12	7460	Czech Republic	49	15	CZ	494	8.3	690.6
Del-10	9230	Serbia	44.944	21.183	RS	225	12.5	673.7
Dja-1	9343	Kyrgyzstan	42.58	73.63	KG	2991	4.7	442.7
Do-0	7102	Germany	50.7224	8.2372	DE	337	9.6	755.1
Dog-4	9060	Turkey	38.301	42.224	TR	1485	10.1	857.2
Don-0	98002	Spain	36.832	-6.36	ES	10	18.7	562.9
Dr-0	7106	Germany	51.051	13.734	DE	115	10.2	533.2
Eden-1	6009	Sweden	62.877	18.177	SE		4.1	685.4
Edi-0	6914	United Kingdom	55.9494	-3.16028	UK	129	8.2	886.2
Ei-2	6915	Germany	50.3	6.3	DE	543	9.6	1003.5
El-0	7117	Germany	51.511	9.683	DE	284	8.8	730.8
Ema-1	7109	United Kingdom	51.3	0.5	UK	9	10.9	705.9
En-D	7121	Germany	50	8.5	DE	111	10.3	662.2
Es-0	7126	Finland	60.1997	24.5682	FI		5.7	644.2
Est-1	6916	Estonia	58.3	25.3	EE	59	6.5	693.8
Ey1.5-2	98003	Germany	48.435	8.768	DE	379	9.2	964.4
Fei-0	8215	Portugal	40.5	-8.32	PT	473	15.2	1039
Ga-0	6919	Germany	50.3	8	DE	346	9.9	694.5
Gd-1	8296	Germany	53.5	10.5	DE	44	9.7	673.3
Gel-1	7143	Netherlands	51.0167	5.86667	NL	39	10.9	724
Gie-0	7147	Germany	50.584	8.67825	DE	163	9.5	728
Got-22	6920	Germany	51.5338	9.9355	DE	156	8.8	730.8
Got-7	6921	Germany	51.5338	9.9355	DE	156	8.8	730.8
Gr-1	8300	Austria	47	15.5	AU	332	8.6	983.9
Gu-0	7149	Germany	50.3	8	DE	346	9.9	694.5
Gy-0	8214	France	49	2	FR	182	12	685.2
Ha-0	7163	Germany	52.3721	9.73569	DE	61	9.6	675
Had-1b	9390	Lebanon	34.25	35.92	LB	1308	18.3	710.5
Hey-1	7166	Netherlands	51.25	5.9	NL	31	10.9	724
HKT2-4	98004	Germany	48.136	9.403	DE	558	8.9	930.9
Hn-0	7165	Germany	51.3472	8.28844	DE	264	9	816.6
Hov3-5	6038	Sweden	56.1	13.74	SE	53	8.1	744.4
HR-10	6923	United Kingdom	51.4083	-0.6383	UK	71	10.4	781
HR-5	6924	United Kingdom	51.4083	-0.6383	UK	71	10.4	781
Hs-0	8310	Germany	52.24	9.44	DE	147	9.6	716.7
ICE-1 (Bolin-1)	98024	Romania	44.46	25.736	RO	108	12.2	595.1
ICE-102 (Galdo-1)	98005	Italy	40.571	15.322	IT	227	12.9	719.1
ICE-104 (Lago-1)	98006	Italy	39.178	16.26	IT	839	14.4	827.8
ICE-106 (Mammo-1)	98007	Italy	38.362	16.23	IT	1182	14.4	827.8
ICE-111 (Monte-1)	98009	Italy	40.28	15.655	IT	501	11.7	779.7
ICE-112 (Moran-1)	98010	Italy	39.831	16.173	IT	532	15.6	760.6
ICE-120 (Valsi-1)	98012	Italy	40.18	16.45	IT	127	13.8	728.3
ICE-130 (Kly-4)	98014	Russia	51.318	82.553	RU	481	2.1	581.9
ICE-138 (Leb-3)	98016	Russia	51.655	80.815	RU	248	3.9	381
ICE-150 (Sij-1)	98017	Kyrgyzstan	41.45	70.05	KG	2619	2.6	607.7
ICE-152 (Sij-2)	98015	Kyrgyzstan	41.45	70.05	KG	2619	2.6	607.7
ICE-153 (Sij-4)	98019	Kyrgyzstan	41.45	70.05	KG	2619	2.6	607.7
ICE-163 (Altenb-2)	98020	Italy	46.372	11.238	IT	600	5.9	1304.3
ICE-169 (Bozen-1.1)	98021	Italy	46.513	11.331	IT	711	3.5	1545.3
ICE-181 (Mitterberg-1)	98023	Italy	46.365	11.284	IT	516	5.9	1304.3
ICE-21 (Petro-1)	98028	Serbia	44.339	21.46	RS	160	12.4	723.7
ICE-213 (Castelfed-4.2)	98026	Italy	46.338	11.293	IT	350	5.9	1304.3
ICE-226 (Vezzano-2.1)	98029	Italy	46.63	10.816	IT	873	-0.2	1914.3
ICE-29 (Slavi-1)	98031	Bulgaria	41.427	23.647	BG	1107	11.8	575.5
ICE-33 (Jablo-1)	98032	Bulgaria	41.588	25.199	BG	884	11.3	664.9
ICE-36 (Dobra-1)	98033	Serbia	44.837	20.157	RS	72	13.1	707.4
ICE-49 (Aitba-2)	98034	Morocco	31.484	-7.45	MA	1373	14.4	380.8
ICE-50 (Toufl-1)	98035	Morocco	31.469	-7.417	MA	1723	14.4	380.8
ICE-61 (Stepn-1)	98037	Russia	54.06	60.479	RU	275	3.1	464.9
ICE-63 (Copac-1)	98038	Romenia	46.109	21.952	RO	139	11.1	630.1
ICE-7 (Lecho-1)	98045	Romania	41.43	23.5	RO	429	11.8	579.9
ICE-70 (Borsk-2)	98039	Russia	53.039	51.746	RU	74	5.5	532.8
ICE-71 (Shigu-1)	98040	Russia	53.333	49.481	RU	181	6	484.7
ICE-73 (Kidr-1)	98042	Russia	51.307	57.561	RU	345	4.6	338.6
ICE-75 (Krazo-2)	98043	Russia	53.088	52	RU	135	5.3	527.8
ICE-79 (Voeran-1)	98044	Italy	46.36	11.23	IT	847	5.9	1304.3
ICE-91 (Angel-1)	98046	Italy	38.619	16.168	IT	241	16.8	785.1
ICE-92 (Angit-1)	98047	Italy	38.763	16.242	IT	68	16.8	785.1
ICE-93 (Apost-1)	98048	Italy	39.008	16.468	IT	823	14.4	827.8
ICE-97 (Ciste-1)	98049	Italy	41.616	12.869	IT	80	15.9	775.7
In-0	8311	Austria	47.5	11.5	AU	1859	7.9	1079.5
Is-0	8312	Germany	50.5	7.5	DE	269	9.9	772.8
Istisu-1	9092	Azerbaijan	38.979	48.559	AZ	98	15.7	279.7
Jl-3	7424	Czech Republic	49.2	16.6166	CZ	210	9.1	559.9
Jm-0	8313	Austria	49	15	AU	494	8.3	690.6
Ka-0	8314	Austria	47	14	AU	1623	4.8	1580.2
Kas-2	8424	India	35	77	IN	5296	-4.6	193.8
Kastel-1	9169	Ukraine	44.642	34.381	UA	391	10.8	642.2
Kelsterbach-4	8420	Germany	50.0667	8.5333	DE	106	9.9	694.5
Kil-0	7192	United Kingdom	55.6395	-5.66364	UK	14	9.5	1348.1
Kin-0	6926	USA	44.46	-85.37	USA	311	6.9	849.6
Kl-5	7199	Germany	50.95	6.9666	DE	47	10.5	863.7
Knox-10	6927	USA	41.282	-86.621	USA	221	10.6	1018.1
Knox-18	6928	USA	41.282	-86.621	USA	221	10.6	1018.1
Koch-1	9185	Ukraine	50.355	29.324	UA	174	8.5	609
Kondara	6929	Tadjikistan	38.48	68.49	TJ	916	15.3	451.5
Kz-1	6930	Kazahstan	49.5	73.1	KZ	639	4.1	303.8
Kz-9	6931	Kazahstan	49.5	73.1	KZ	639	4.1	303.8
Lag2-2	98051	Georgia	41.83	46.283	GE	490	9.9	752
Leo-1	98052	Spain	41.796	-3.115	ES	1019	11.8	543.5
Ler-1	6932	Germany	47.984	10.8719	DE	614	8.4	1104.3
Lerik1-3	9074	Azerbaijan	38.741	48.613	AZ	321	15.7	279.7
Li2:1	7223	Germany	50.383	8.067	DE	135	9.9	694.5
Lip-0	8325	Poland	50	19.3	PL	236	9.1	710.7
LL-0	6933	Spain	41.59	2.49	ES	353	14.3	679.1
Lm-2	8329	France	48	0.5	FR	147	11.2	706
Lp2-2	7520	Czech Republic	49.38	16.81	CZ	567	9.1	559.9
Lp2-6	7521	Czech Republic	49.38	16.81	CZ	567	9.1	559.9
Lz-0	6936	France	46	3.3	FR	323	11.4	761.1
Mc-0	7252	United Kingdom	54.6167	-2.3	UK	781	7.4	1183.2
Me-0	7250	Germany	51.9183	10.1138	DE	159	8.9	662.4
Mer-6	98053	Spain	38.916	-6.338	ES	353	14.3	679.1
Mh-0	7255	Poland	50.95	20.5	PL	277	8.8	630.8
Mir-0	8337	Italy	44	12.37	IT	132	14.1	668.3
Mnz-0	7244	Germany	50.001	8.26664	DE	239	9.2	630
Mr-0	7522	Italy	44.15	9.65	IT	107	13	923.9
Mrk-0	6937	Germany	49	9.3	DE	225	10.5	617.4
Ms-0	6938	Russia	55.752	37.632	RU	132	6.1	691.7
Mt-0	6939	Libya	32.34	22.46	LY	283	18.7	356.3
Mz-0	6940	Germany	50.3	8.3	DE	344	9.9	694.5
N13	7438	Russia	61.36	34.15	RU		3.6	679.9
Na-1	8343	France	47.5	1.5	FR	127	12	618.9
Nc-1	7430	France	48.6167	6.25	FR	221	10.3	805.8
Nd-1	6942	Germany	50	10	DE	289	9.2	630
Nemrut-1	9257	Turkey	38.643	42.239	TR	2264	8.7	704.8
NFA-10	6943	United Kingdom	51.4083	-0.6383	UK	71	10.4	781
NFA-8	6944	United Kingdom	51.4083	-0.6383	UK	71	10.4	781
Niel-2	98054	Germany	48.518	8.803	DE	501	9.8	817.3
Nok-3	6945	Netherlands	52.24	4.45	NL	1	10.8	800.4
Np-0	7268	Germany	52.6969	10.981	DE	52	9.7	632.2
Nw-0	7258	Germany	50.5	8.5	DE	274	9.5	728
Ob-0	7276	Germany	50.2	8.583	DE	200	10.3	662.2
Old-1	7280	Germany	53.1667	8.2	DE	10	9.9	761.3
Omo2-1	7518	Sweden	56.151	15.774	SE	14	8	590
Omo2-3	7519	Sweden	56.151	15.774	SE	14	8	590
Or-0	7282	Germany	50.3827	8.01161	DE	147	9.9	694.5
Ove-0	7287	Germany	53.342	8.423	DE	3	9.9	761.3
Oy-0	6946	Norway	60.385543	6.19301	NO		5.3	1978.4
Ped-0	98055	Spain	40.739	-3.898	ES	1115	11.9	534.5
Per-1	8354	Russia	56.3167	58	RU	276	2.6	604
PHW-37	7508	France	48.6103	2.3086	FR	72	12.5	634.3
Pla-0	7300	Spain	41.5	2.25	ES	226	14.3	679.1
Pna-10	7526	USA	42.0945	-86.3253	USA	223	10.1	1003.1
Pna-17	7523	USA	42.0945	-86.3253	USA	223	10.1	1003.1
Pog-0	7306	Canada	49.2655	-123.206	CA	69	9.9	1574.6
Pra-6	98056	Spain	41.05	-3.539	ES	1082	11.5	560.7
Pro-0	8213	Spain	43.25	-6	ES	324	11.1	931.9
Pu2-23	6951	Czech Republic	49.42	16.36	CZ	492	8.6	598.6
Pu2-7	6956	Czech Republic	49.42	16.36	CZ	492	8.6	598.6
Ra-0	6958	France	46	3.3	FR	323	11.4	761.1
Rd-0	8366	Germany	50.5	8.5	DE	274	9.5	728
Rennes-1	6959	France	48.5	1.41	FR	160	11.4	657.1
Ri-0	7317	Canada	49.163	-123.137	CA	6	9.9	1574.6
Rmx-A02	7524	USA	42.036	-86.511	USA	194	9.8	864.7
Rmx-A180	7525	USA	42.036	-86.511	USA	194	9.8	864.7
Rou-0	7320	France	49.4424	1.09849	FR	19	11.5	717.3
RRS-10	7515	USA	41.5609	-86.4251	USA	219	10.4	1037.1
RRS-7	7514	USA	41.5609	-86.4251	USA	219	10.4	1037.1
Rubeznhoe-1	7323	Ukraine	49	38.28	UA	134	8.9	522.1
Sap-0	8378	Czech Republic	49.49	14.24	CZ	494	9.1	594.9
Sapporo-0	7330	Japan	43.0553	141.346	JP	25	7.4	1261.6
Sav-0	7340	Czech Republic	49.1833	15.8833	CZ	484	8.8	604.8
Se-0	6961	Spain	38.3333	-3.53333	ES	737	16.2	447.5
Seattle-0	8245	USA	47	-122.2	USA	170	11.8	1054.4
Sei-0	7333	Italy	46.5438	11.5614	IT	1006	1.9	1585.4
Sha	6962	Afganistan	37.29	71.3	AF	4185	3.2	534.1
Si-0	7337	Germany	50.8738	8.02341	DE	266	9.6	755.1
Sorbo	6963	Tadjikistan	38.35	68.48	TJ	646	15.3	451.1
Sp-0	7343	Germany	52.5339	13.181	DE	34	10.1	581.5
Spr1-6	6965	Sweden	58.4173	14.1576	SE	117	6.9	629.5
Sq-1	6966	United Kingdom	51.4083	-0.6383	UK	71	10.4	781
Sq-8	6967	United Kingdom	51.4083	-0.6383	UK	71	10.4	781
St-0	8387	Sweden	59	18	SE	37	7.2	476.5
Star-8	98060	Germany	48.435	8.817	DE	522	9.2	964.4
Stw-0	8388	Iran	36	52	IR	3423	15.4	225.1
Ta-0	8389	Czech Republic	49.5	14.5	CZ	624	8.7	652.6
Tamm-2	6968	Finland	60	23.5	FI	36	5.3	657
Tamm-27	6969	Finland	60	23.5	FI	36	5.3	657
Te-0	7352	Finland	60.058	23.298	FI		5.7	597.2
Ting-1	7354	Sweden	56.5	14.9	SE	168	7.6	677
Tiv-1	7355	Italy	41.96	12.8	IT	253	15.9	775.7
Ts-1	6970	Spain	41.7194	2.93056	ES	12	15.6	666
Ts-5	6971	Spain	41.7194	2.93056	ES	12	15.6	666
Tscha-1	7372	Austria	47.0748	9.9042	AU	680	6.7	1546.2
Tsu-0	7373	Japan	34.43	136.31	JP	158	13.7	2635
Tsu-1	6972	Japan	34.43	136.31	JP	158	13.7	2635
Tu-0	8395	Italy	45	7.05	IT	2470	6.1	1456.9
Tu-Scha-9	98062	Germany	48.534	9.05	DE	428	10.2	660.2
Tu-V-13	98063	Germany	48.523	9.052	DE	333	10.2	660.2
Tu-Wa-1-2	98064	Germany	48.534	9.035	DE	456	10.2	660.2
Ty-0	7351	United Kingdom	56.4278	-5.23439	UK	25	7.5	3110.8
Ull2-3	6973	Sweden	56.0648	13.9707	SE	29	8.1	744.4
Uod-1	6975	Austria	48.3	14.45	AU	398	10.3	808.9
Uod-7	6976	Austria	48.3	14.45	AU	398	10.3	808.9
Utrecht	7382	Netherlands	52.0918	5.1145	NL	14	10.4	820.4
Van-0	6977	Canada	49.3	-123	CA		10	2246.4
Vash-1	9116	Georgia	41.238	46.373	GE	408	13.5	570.2
Ven-1	7384	Netherlands	52.0333	5.55	NL	10	10.3	789.1
Wa-1	6978	Poland	52.3	21	PL	79	9	501.2
WalHasB-4	98066	Germany	48.596	9.186	DE	445	10.2	660.2
Wc-1	7404	Germany	52.6	10.067	DE	39	9.8	660.8
Wei-0	6979	Switzerland	47.25	8.26	CH	626	9.5	1231.7
Wl-0	7411	Germany	47.9299	10.8134	DE	700	8.4	1104.3
Ws-0	6980	Bielarus	52.3	30	BY	133	8.1	618.2
Ws-2	6981	Bielarus	52.3	30	BY	133	8.1	618.2
Wt-5	6982	Germany	52.3	9.3	DE	116	9.6	716.7
Xan-1	9065	Azerbaijan	38.654	48.799	AZ	17	15.7	279.7
Yeg-1	9127	Armenia	39.869	45.362	AM	1528	9.7	378.4
Yo-0	6983	USA	37.45	-119.35	USA	1900	10.4	781
Zdr-1	6984	Czech Republic	49.3853	16.2544	CZ	501	8.6	598.6
Zdr-6	6985	Czech Republic	49.3853	16.2544	CZ	501	8.6	598.6
