# Supplementary material for: Genetic Variability of Arabidopsis thaliana Mature Root System Architecture and Genome-Wide Association Study
Source: Front Plant Sci. 2022 Jan 28;12:814110. doi: 10.3389/fpls.2021.814110 (PMC8831901; doi:10.3389/fpls.2021.814110)
Supplement: Supplementary file 8 [file Table_5.XLSX]

## Sheet: Sheet1
Supplementary Table 5: List of all SNPs generated via QTCAT analysis with genen annotation that is located within the SNP loci
trait name		loci SNP	gene annotatation
Width_Depth_ratio	1	3809067	AT1G11320
Width_Depth_ratio	1	3809067	AT1G11330
Width_Depth_ratio	1	3809067	AT1G11300
Width_Depth_ratio	1	3809067	AT1G11350
Width_Depth_ratio	1	3809067	AT1G11340
Width_Depth_ratio	1	3809067	AT1G11310
Width_Depth_ratio	1	6143646	AT1G17840
Width_Depth_ratio	1	6143646	AT1G17850
Width_Depth_ratio	1	6143646	AT1G17820
Width_Depth_ratio	1	6143646	AT1G17860
Width_Depth_ratio	1	6143646	AT1G17830
Width_Depth_ratio	1	6143646	AT1G17890
Width_Depth_ratio	1	6143646	AT1G17870
Width_Depth_ratio	1	6145405	AT1G17830
Width_Depth_ratio	1	6145405	AT1G17840
Width_Depth_ratio	1	6145405	AT1G17860
Width_Depth_ratio	1	6145405	AT1G17870
Width_Depth_ratio	1	6145405	AT1G17880
Width_Depth_ratio	1	6145405	AT1G17890
Width_Depth_ratio	1	6145405	AT1G17850
Width_Depth_ratio	1	6146852	AT1G17830
Width_Depth_ratio	1	6146852	AT1G17840
Width_Depth_ratio	1	6146852	AT1G17860
Width_Depth_ratio	1	6146852	AT1G17870
Width_Depth_ratio	1	6146852	AT1G17880
Width_Depth_ratio	1	6146852	AT1G17890
Width_Depth_ratio	1	6146852	AT1G17850
Width_Depth_ratio	1	6147622	AT1G17830
Width_Depth_ratio	1	6147622	AT1G17840
Width_Depth_ratio	1	6147622	AT1G17860
Width_Depth_ratio	1	6147622	AT1G17870
Width_Depth_ratio	1	6147622	AT1G17880
Width_Depth_ratio	1	6147622	AT1G17890
Width_Depth_ratio	1	6147622	AT1G17850
Width_Depth_ratio	1	6147622	AT1G17900
Width_Depth_ratio	1	6148001	AT1G17830
Width_Depth_ratio	1	6148001	AT1G17840
Width_Depth_ratio	1	6148001	AT1G17860
Width_Depth_ratio	1	6148001	AT1G17870
Width_Depth_ratio	1	6148001	AT1G17880
Width_Depth_ratio	1	6148001	AT1G17890
Width_Depth_ratio	1	6148001	AT1G17850
Width_Depth_ratio	1	6148001	AT1G17900
Width_Depth_ratio	1	6148107	AT1G17830
Width_Depth_ratio	1	6148107	AT1G17840
Width_Depth_ratio	1	6148107	AT1G17860
Width_Depth_ratio	1	6148107	AT1G17870
Width_Depth_ratio	1	6148107	AT1G17880
Width_Depth_ratio	1	6148107	AT1G17890
Width_Depth_ratio	1	6148107	AT1G17850
Width_Depth_ratio	1	6148107	AT1G17900
Width_Depth_ratio	1	6148777	AT1G17840
Width_Depth_ratio	1	6148777	AT1G17860
Width_Depth_ratio	1	6148777	AT1G17870
Width_Depth_ratio	1	6148777	AT1G17880
Width_Depth_ratio	1	6148777	AT1G17890
Width_Depth_ratio	1	6148777	AT1G17850
Width_Depth_ratio	1	6148777	AT1G17900
Width_Depth_ratio	1	6148882	AT1G17840
Width_Depth_ratio	1	6148882	AT1G17860
Width_Depth_ratio	1	6148882	AT1G17870
Width_Depth_ratio	1	6148882	AT1G17880
Width_Depth_ratio	1	6148882	AT1G17890
Width_Depth_ratio	1	6148882	AT1G17850
Width_Depth_ratio	1	6148882	AT1G17900
Width_Depth_ratio	1	30058370	AT1G79880
Width_Depth_ratio	1	30058370	AT1G79890
Width_Depth_ratio	1	30058370	AT1G79900
Width_Depth_ratio	1	30058370	AT1G79910
Width_Depth_ratio	1	30058370	AT1G79915
Width_Depth_ratio	1	30058370	AT1G79920
Width_Depth_ratio	1	30058370	AT1G79930
Width_Depth_ratio	2	12796883	AT2G29990
Width_Depth_ratio	2	12796883	AT2G29995
Width_Depth_ratio	2	12796883	AT2G30000
Width_Depth_ratio	2	12796883	AT2G30010
Width_Depth_ratio	3	5695872	AT3G16690
Width_Depth_ratio	3	5695872	AT3G16700
Width_Depth_ratio	3	5695872	AT3G16710
Width_Depth_ratio	3	5695872	AT3G16712
Width_Depth_ratio	3	5695872	AT3G16720
Width_Depth_ratio	3	5695872	AT3G16730
Width_Depth_ratio	3	5695872	AT3G16740
Width_Depth_ratio	3	5695872	AT3G16750
Width_Depth_ratio	3	5695872	AT3G16760
Width_Depth_ratio	3	5695872	AT3G16770
Width_Depth_ratio	3	5697459	AT3G16700
Width_Depth_ratio	3	5697459	AT3G16710
Width_Depth_ratio	3	5697459	AT3G16712
Width_Depth_ratio	3	5697459	AT3G16720
Width_Depth_ratio	3	5697459	AT3G16730
Width_Depth_ratio	3	5697459	AT3G16740
Width_Depth_ratio	3	5697459	AT3G16750
Width_Depth_ratio	3	5697459	AT3G16760
Width_Depth_ratio	3	5698503	AT3G16770
Width_Depth_ratio	3	5700369	AT3G16710
Width_Depth_ratio	3	5700369	AT3G16712
Width_Depth_ratio	3	5700369	AT3G16720
Width_Depth_ratio	3	5700369	AT3G16730
Width_Depth_ratio	3	5700369	AT3G16740
Width_Depth_ratio	3	5700369	AT3G16750
Width_Depth_ratio	3	5700369	AT3G16760
Width_Depth_ratio	3	5700369	AT3G16770
Width_Depth_ratio	3	5700369	AT3G16780
Width_Depth_ratio	3	5703260	AT3G16720
Width_Depth_ratio	3	5703260	AT3G16730
Width_Depth_ratio	3	5703260	AT3G16740
Width_Depth_ratio	3	5703260	AT3G16750
Width_Depth_ratio	3	5703260	AT3G16760
Width_Depth_ratio	3	5703260	AT3G16770
Width_Depth_ratio	3	5703260	AT3G16780
Width_Depth_ratio	3	5703260	AT3G16785
Width_Depth_ratio	3	5703719	AT3G16720
Width_Depth_ratio	3	5703719	AT3G16730
Width_Depth_ratio	3	5703719	AT3G16740
Width_Depth_ratio	3	5703719	AT3G16750
Width_Depth_ratio	3	5703719	AT3G16760
Width_Depth_ratio	3	5703719	AT3G16770
Width_Depth_ratio	3	5703719	AT3G16780
Width_Depth_ratio	3	5703719	AT3G16785
Width_Depth_ratio	3	5703934	AT3G16720
Width_Depth_ratio	3	5703934	AT3G16730
Width_Depth_ratio	3	5703934	AT3G16740
Width_Depth_ratio	3	5703934	AT3G16750
Width_Depth_ratio	3	5703934	AT3G16760
Width_Depth_ratio	3	5703934	AT3G16770
Width_Depth_ratio	3	5703934	AT3G16780
Width_Depth_ratio	3	5703934	AT3G16785
Width_Depth_ratio	3	5704799	AT3G16730
Width_Depth_ratio	3	5704799	AT3G16740
Width_Depth_ratio	3	5704799	AT3G16750
Width_Depth_ratio	3	5704799	AT3G16760
Width_Depth_ratio	3	5704799	AT3G16770
Width_Depth_ratio	3	5704799	AT3G16780
Width_Depth_ratio	3	5704799	AT3G16785
Width_Depth_ratio	3	5704910	AT3G16730
Width_Depth_ratio	3	5704910	AT3G16740
Width_Depth_ratio	3	5704910	AT3G16750
Width_Depth_ratio	3	5704910	AT3G16760
Width_Depth_ratio	3	5704910	AT3G16770
Width_Depth_ratio	3	5704910	AT3G16780
Width_Depth_ratio	3	5704910	AT3G16785
Width_Depth_ratio	3	5705492	AT3G16730
Width_Depth_ratio	3	5705492	AT3G16740
Width_Depth_ratio	3	5705492	AT3G16750
Width_Depth_ratio	3	5705492	AT3G16760
Width_Depth_ratio	3	5705492	AT3G16770
Width_Depth_ratio	3	5705492	AT3G16780
Width_Depth_ratio	3	5705492	AT3G16785
Width_Depth_ratio	3	5706324	AT3G16730
Width_Depth_ratio	3	5706324	AT3G16740
Width_Depth_ratio	3	5706324	AT3G16750
Width_Depth_ratio	3	5706324	AT3G16760
Width_Depth_ratio	3	5706324	AT3G16770
Width_Depth_ratio	3	5706324	AT3G16780
Width_Depth_ratio	3	5706324	AT3G16785
Width_Depth_ratio	3	5706405	AT3G16730
Width_Depth_ratio	3	5706405	AT3G16740
Width_Depth_ratio	3	5706405	AT3G16750
Width_Depth_ratio	3	5706405	AT3G16760
Width_Depth_ratio	3	5706405	AT3G16770
Width_Depth_ratio	3	5706405	AT3G16780
Width_Depth_ratio	3	5706405	AT3G16785
Width_Depth_ratio	3	5706618	AT3G16730
Width_Depth_ratio	3	5706618	AT3G16740
Width_Depth_ratio	3	5706618	AT3G16750
Width_Depth_ratio	3	5706618	AT3G16760
Width_Depth_ratio	3	5706618	AT3G16770
Width_Depth_ratio	3	5706618	AT3G16780
Width_Depth_ratio	3	5706618	AT3G16785
Width_Depth_ratio	3	5706702	AT3G16730
Width_Depth_ratio	3	5706702	AT3G16740
Width_Depth_ratio	3	5706702	AT3G16750
Width_Depth_ratio	3	5706702	AT3G16760
Width_Depth_ratio	3	5706702	AT3G16770
Width_Depth_ratio	3	5706702	AT3G16780
Width_Depth_ratio	3	5706702	AT3G16785
Width_Depth_ratio	3	9160309	AT3G25120
Width_Depth_ratio	3	9160309	AT3G25130
Width_Depth_ratio	3	9160309	AT3G25140
Width_Depth_ratio	3	9160309	AT3G25150
Width_Depth_ratio	3	9160309	AT3G25160
Width_Depth_ratio	3	9160309	AT3G25165
Width_Depth_ratio	3	9160309	AT3G25170
Width_Depth_ratio	3	9160309	AT3G25180
Width_Depth_ratio	5	9205446	AT5G26250
Width_Depth_ratio	5	9205446	AT5G26260
Width_Depth_ratio	5	9205446	AT5G26262
Width_Depth_ratio	5	9205446	AT5G26270
Width_Depth_ratio	5	9205446	AT5G26280
Width_Depth_ratio	5	9205446	AT5G26283
Width_Depth_ratio	5	16650731	AT5G41610
Width_Depth_ratio	5	16650731	AT5G41614
Width_Depth_ratio	5	16650731	AT5G41620
Width_Depth_ratio	5	16650731	AT5G41630
Width_Depth_ratio	5	16650731	AT5G41640
Width_Depth_ratio	5	16650731	AT5G41650
Width_Depth_ratio	5	16650731	AT5G41660
Width_Depth_ratio	5	16650731	AT5G41663
Shoot_root_ratio	1	21312371	AT1G57410
Shoot_root_ratio	1	21312371	AT1G57420
Shoot_root_ratio	1	21312371	AT1G57430
Shoot_root_ratio	1	21312371	AT1G57440
Shoot_root_ratio	1	21312371	AT1G57450
Shoot_root_ratio	1	21312371	AT1G57460
Shoot_root_ratio	1	21312371	AT1G57470
Shoot_root_ratio	1	21312371	AT1G57480
Shoot_root_ratio	1	21312371	AT1G57490
Shoot_root_ratio	1	21312371	AT1G57500
Shoot_root_ratio	1	21312371	AT1G57510
Shoot_root_ratio	1	21312371	AT1G57520
Shoot_root_ratio	1	21312371	AT1G57530
Shoot_root_ratio	1	21312371	AT1G57540
Shoot_root_ratio	1	21312371	AT1G57550
Shoot_root_ratio	1	21312371	AT1G57560
Shoot_root_ratio	1	21312371	AT1G57565
Shoot_root_ratio	1	21312371	AT1G57570
Shoot_root_ratio	5	9201335	AT5G26240
Shoot_root_ratio	5	9201335	AT5G26250
Shoot_root_ratio	5	9201335	AT5G26260
Shoot_root_ratio	5	9201335	AT5G26262
Shoot_root_ratio	5	9201335	AT5G26270
Shoot_root_ratio	5	9201335	AT5G26280
Shoot_root_ratio	5	23375412	AT5G57685
Shoot_root_ratio	5	23375412	AT5G57690
Shoot_root_ratio	5	23375412	AT5G57700
Shoot_root_ratio	5	23375412	AT5G57710
Shoot_root_ratio	5	26391820	AT5G65950
Shoot_root_ratio	5	26391820	AT5G65960
Shoot_root_ratio	5	26391820	AT5G65970
Shoot_root_ratio	5	26391820	AT5G65980
Shoot_root_ratio	5	26391820	AT5G65990
Shoot_root_ratio	5	26391820	AT5G66000
Shoot_root_ratio	5	26391820	AT5G66005
Shoot_root_ratio	5	26391820	AT5G66010
Shoot_root_ratio	5	26391820	AT5G66020
Shoot_Biomass	1	13611976	AT1G36225
Shoot_Biomass	1	13611976	AT1G36230
Shoot_Biomass	1	13611976	AT1G36240
Shoot_Biomass	1	13611976	AT1G36250
Shoot_Biomass	1	13612364	AT1G36225
Shoot_Biomass	1	13612364	AT1G36230
Shoot_Biomass	1	13612364	AT1G36240
Shoot_Biomass	1	13612364	AT1G36250
Shoot_Biomass	1	13612695	AT1G36225
Shoot_Biomass	1	13612695	AT1G36230
Shoot_Biomass	1	13612695	AT1G36240
Shoot_Biomass	1	13612695	AT1G36250
Shoot_Biomass	1	13613618	AT1G36225
Shoot_Biomass	1	13613618	AT1G36230
Shoot_Biomass	1	13613618	AT1G36240
Shoot_Biomass	1	13613618	AT1G36250
Shoot_Biomass	1	13614983	AT1G36225
Shoot_Biomass	1	13614983	AT1G36230
Shoot_Biomass	1	13614983	AT1G36240
Shoot_Biomass	1	13614983	AT1G36250
Shoot_Biomass	1	13617202	AT1G36225
Shoot_Biomass	1	13617202	AT1G36230
Shoot_Biomass	1	13617202	AT1G36240
Shoot_Biomass	1	13617202	AT1G36250
Shoot_Biomass	1	13617202	AT1G36260
Shoot_Biomass	1	13618250	AT1G36230
Shoot_Biomass	1	13618250	AT1G36240
Shoot_Biomass	1	13618250	AT1G36250
Shoot_Biomass	1	13618250	AT1G36260
Shoot_Biomass	1	13618894	AT1G36230
Shoot_Biomass	1	13618894	AT1G36240
Shoot_Biomass	1	13618894	AT1G36250
Shoot_Biomass	1	13618894	AT1G36260
Shoot_Biomass	1	13618894	AT1G36270
Shoot_Biomass	1	13619234	AT1G36230
Shoot_Biomass	1	13619234	AT1G36240
Shoot_Biomass	1	13619234	AT1G36250
Shoot_Biomass	1	13619234	AT1G36260
Shoot_Biomass	1	13619234	AT1G36270
Shoot_Biomass	1	13619783	AT1G36230
Shoot_Biomass	1	13619783	AT1G36240
Shoot_Biomass	1	13619783	AT1G36250
Shoot_Biomass	1	13619783	AT1G36260
Shoot_Biomass	1	13619783	AT1G36270
Shoot_Biomass	1	13619896	AT1G36230
Shoot_Biomass	1	13619896	AT1G36240
Shoot_Biomass	1	13619896	AT1G36250
Shoot_Biomass	1	13619896	AT1G36260
Shoot_Biomass	1	13619896	AT1G36270
Shoot_Biomass	1	13620281	AT1G36230
Shoot_Biomass	1	13620281	AT1G36240
Shoot_Biomass	1	13620281	AT1G36250
Shoot_Biomass	1	13620281	AT1G36260
Shoot_Biomass	1	13620281	AT1G36270
Shoot_Biomass	1	13621199	AT1G36230
Shoot_Biomass	1	13621199	AT1G36240
Shoot_Biomass	1	13621199	AT1G36250
Shoot_Biomass	1	13621199	AT1G36260
Shoot_Biomass	1	13621199	AT1G36270
Shoot_Biomass	1	13621407	AT1G36230
Shoot_Biomass	1	13621407	AT1G36240
Shoot_Biomass	1	13621407	AT1G36250
Shoot_Biomass	1	13621407	AT1G36260
Shoot_Biomass	1	13621407	AT1G36270
Shoot_Biomass	1	13622736	AT1G36230
Shoot_Biomass	1	13622736	AT1G36240
Shoot_Biomass	1	13622736	AT1G36250
Shoot_Biomass	1	13622736	AT1G36260
Shoot_Biomass	1	13622736	AT1G36270
Shoot_Biomass	1	13623025	AT1G36230
Shoot_Biomass	1	13623025	AT1G36240
Shoot_Biomass	1	13623025	AT1G36250
Shoot_Biomass	1	13623025	AT1G36260
Shoot_Biomass	1	13623025	AT1G36270
Shoot_Biomass	1	13624653	AT1G36240
Shoot_Biomass	1	13624653	AT1G36250
Shoot_Biomass	1	13624653	AT1G36260
Shoot_Biomass	1	13624653	AT1G36270
Shoot_Biomass	1	13624936	AT1G36240
Shoot_Biomass	1	13624936	AT1G36250
Shoot_Biomass	1	13624936	AT1G36260
Shoot_Biomass	1	13624936	AT1G36270
Shoot_Biomass	1	13625170	AT1G36240
Shoot_Biomass	1	13625170	AT1G36250
Shoot_Biomass	1	13625170	AT1G36260
Shoot_Biomass	1	13625170	AT1G36270
Shoot_Biomass	1	13632848	AT1G36250
Shoot_Biomass	1	13632848	AT1G36260
Shoot_Biomass	1	13632848	AT1G36270
Shoot_Biomass	1	13632848	AT1G36272
Shoot_Biomass	1	13632848	AT1G36280
Shoot_Biomass	1	13633029	AT1G36250
Shoot_Biomass	1	13633029	AT1G36260
Shoot_Biomass	1	13633029	AT1G36270
Shoot_Biomass	1	13633029	AT1G36272
Shoot_Biomass	1	13633029	AT1G36280
Shoot_Biomass	1	13633376	AT1G36250
Shoot_Biomass	1	13633376	AT1G36260
Shoot_Biomass	1	13633376	AT1G36270
Shoot_Biomass	1	13633376	AT1G36272
Shoot_Biomass	1	13633376	AT1G36280
Shoot_Biomass	1	13633376	AT1G36290
Shoot_Biomass	1	13634321	AT1G36260
Shoot_Biomass	1	13634321	AT1G36270
Shoot_Biomass	1	13634321	AT1G36272
Shoot_Biomass	1	13634321	AT1G36280
Shoot_Biomass	1	13634321	AT1G36290
Shoot_Biomass	1	13638521	AT1G36270
Shoot_Biomass	1	13638521	AT1G36272
Shoot_Biomass	1	13638521	AT1G36280
Shoot_Biomass	1	13638521	AT1G36290
Shoot_Biomass	1	13638521	AT1G36300
Shoot_Biomass	1	13639050	AT1G36270
Shoot_Biomass	1	13639050	AT1G36272
Shoot_Biomass	1	13639050	AT1G36280
Shoot_Biomass	1	13639050	AT1G36290
Shoot_Biomass	1	13639050	AT1G36300
Shoot_Biomass	1	13640871	AT1G36270
Shoot_Biomass	1	13640871	AT1G36272
Shoot_Biomass	1	13640871	AT1G36280
Shoot_Biomass	1	13640871	AT1G36290
Shoot_Biomass	1	13640871	AT1G36300
Shoot_Biomass	1	13641608	AT1G36270
Shoot_Biomass	1	13641608	AT1G36272
Shoot_Biomass	1	13641608	AT1G36280
Shoot_Biomass	1	13641608	AT1G36290
Shoot_Biomass	1	13641608	AT1G36300
Shoot_Biomass	1	13642068	AT1G36270
Shoot_Biomass	1	13642068	AT1G36272
Shoot_Biomass	1	13642068	AT1G36280
Shoot_Biomass	1	13642068	AT1G36290
Shoot_Biomass	1	13642068	AT1G36300
Shoot_Biomass	1	13642341	AT1G36270
Shoot_Biomass	1	13642341	AT1G36272
Shoot_Biomass	1	13642341	AT1G36280
Shoot_Biomass	1	13642341	AT1G36290
Shoot_Biomass	1	13642341	AT1G36300
Shoot_Biomass	3	8461941	AT3G23560
Shoot_Biomass	3	8461941	AT3G23570
Shoot_Biomass	3	8461941	AT3G23580
Shoot_Biomass	3	8461941	AT3G23590
Shoot_Biomass	5	271651	AT5G01700
Shoot_Biomass	5	271651	AT5G01710
Shoot_Biomass	5	271651	AT5G01712
Shoot_Biomass	5	271651	AT5G01720
Shoot_Biomass	5	271651	AT5G01715
Shoot_Biomass	5	271651	AT5G01730
Shoot_Biomass	5	271651	AT5G01732
Shoot_Biomass	5	271651	AT5G01734
Shoot_Biomass	5	271651	AT5G01740
Shoot_Biomass	5	3139375	AT5G10010
Shoot_Biomass	5	3139375	AT5G10020
Shoot_Biomass	5	3139375	AT5G10030
Shoot_Biomass	5	3139375	AT5G10040
Shoot_Biomass	5	3139375	AT5G10050
Shoot_Biomass	5	3139375	AT5G10060
Shoot_Biomass	5	3139375	AT5G10070
Shoot_Biomass	5	21523893	AT5G53060
Shoot_Biomass	5	21523893	AT5G53070
Shoot_Biomass	5	21523893	AT5G53080
Shoot_Biomass	5	21523893	AT5G52090
Shoot_Biomass	5	21523893	AT5G53100
Shoot_Biomass	5	21523893	AT5G53110
Width	1	30058370	AT1G79880
Width	1	30058370	AT1G79890
Width	1	30058370	AT1G79900
Width	1	30058370	AT1G79910
Width	1	30058370	AT1G79915
Width	1	30058370	AT1G79920
Width	1	30058370	AT1G79930
Width	2	12796883	AT2G29990
Width	2	12796883	AT2G29995
Width	2	12796883	AT2G30000
Width	2	12796883	AT2G30010
Width	3	9160309	AT3G25120
Width	3	9160309	AT3G25130
Width	3	9160309	AT3G25140
Width	3	9160309	AT3G25150
Width	3	9160309	AT3G25160
Width	3	9160309	AT3G25165
Width	3	9160309	AT3G25170
Width	3	9160309	AT3G25180
Width	5	16650731	AT5G41610
Width	5	16650731	AT5G41614
Width	5	16650731	AT5G41620
Width	5	16650731	AT5G41630
Width	5	16650731	AT5G41640
Width	5	16650731	AT5G41650
Width	5	16650731	AT5G41660
Width	5	16650731	AT5G41663
Width	5	16650967	AT5G41610
Width	5	16650967	AT5G41614
Width	5	16650967	AT5G41620
Width	5	16650967	AT5G41630
Width	5	16650967	AT5G41640
Width	5	16650967	AT5G41650
Width	5	16650967	AT5G41660
Width	5	16650967	AT5G41663
Width	5	16809417	AT5G42000
Width	5	16809417	AT5G42010
Width	5	16809417	AT5G42020
Width	5	16809417	AT5G42030
Width	5	16809417	AT5G42040
Width	5	16809417	AT5G42050
Width	5	16809417	AT5G42060
Width	5	16809417	AT5G42053
Total_root_length	3	11742684	AT3G29820
Total_root_length	3	11742684	AT3G29830
Total_root_length	3	11742684	AT3G29970
Total_root_length	3	11742684	AT3G30110
Total_root_length	3	11742684	AT3G30120
Solidity	1	24560049	AT1G65950
Solidity	1	24560049	AT1G65960
Solidity	1	24560049	AT1G65970
Solidity	1	24560049	AT1G65980
Solidity	1	24560049	AT1G65985
Solidity	3	11721217	AT3G29796
Solidity	3	11721217	AT3G29797
Solidity	3	11721217	AT3G29798
Solidity	3	11721217	AT3G29800
Solidity	3	11721217	AT3G29805
Solidity	3	11721217	AT3G29810
Solidity	4	8085456	AT4G13970
Solidity	4	8085456	AT4G13980
Solidity	4	8085456	AT4G13985
Solidity	4	8085456	AT4G13990
Solidity	4	8085456	AT4G13992
Solidity	4	8085456	AT4G13996
Solidity	4	8085456	AT4G14000
Solidity	4	8085456	AT4G14010
Solidity	4	8085456	AT4G14020
Solidity	5	16060027	AT5G40110
Solidity	5	16060027	AT5G40120
Solidity	5	16060027	AT5G40130
Solidity	5	16060027	AT5G40140
Solidity	5	16060027	AT5G40150
Solidity	5	16060027	AT5G40155
Solidity	5	16060027	AT5G40160
Solidity	5	16060027	AT5G40170
Solidity	5	16060027	AT5G40180
Solidity	5	16060027	AT5G40190
Solidity	5	19203629	AT5G47280
Solidity	5	19203629	AT5G47290
Solidity	5	19203629	AT5G47300
Solidity	5	19203629	AT5G47306
Solidity	5	19203629	AT5G47310
Solidity	5	19203629	AT5G47320
Solidity	5	19203629	AT5G47330
Solidity	5	19203629	AT5G47340
Solidity	5	19203629	AT5G47350
Solidity	5	24546042	AT5G60970
Solidity	5	24546042	AT5G60978
Solidity	5	24546042	AT5G60980
Solidity	5	24546042	AT5G60990
Solidity	5	24546042	AT5G61000
Solidity	5	24546042	AT5G61010
Length_distribituion	1	4832970	AT1G14080
Length_distribituion	1	4832970	AT1G14090
Length_distribituion	1	4832970	AT1G14100
Length_distribituion	1	4832970	AT1G14110
Length_distribituion	1	4832970	AT1G14120
Length_distribituion	1	4832970	AT1G14130
Length_distribituion	1	4832970	AT1G14140
Length_distribituion	1	4832970	AT1G14150
Length_distribituion	1	4832970	AT1G14160
Length_distribituion	1	23256122	AT1G62770
Length_distribituion	1	23256122	AT1G62780
Length_distribituion	1	23256122	AT1G62790
Length_distribituion	1	23256122	AT1G62800
Length_distribituion	1	23256122	AT1G62810
Length_distribituion	1	23256122	AT1G62820
Length_distribituion	1	23256122	AT1G62830
Length_distribituion	4	6676321	AT4G10850
Length_distribituion	4	6676321	AT4G10860
Length_distribituion	4	6676321	AT4G10865
Length_distribituion	4	6676321	AT4G10870
Length_distribituion	4	6676321	AT4G10880
Length_distribituion	5	1787753	AT5G05920
Length_distribituion	5	1787753	AT5G05930
Length_distribituion	5	1787753	AT5G05940
Length_distribituion	5	1787753	AT5G05945
Length_distribituion	5	1787753	AT5G05950
Length_distribituion	5	1787753	AT5G05960
Length_distribituion	5	1787753	AT5G05965
Length_distribituion	5	1787753	AT5G05970
root_depth	1	17287216	AT1G47056
root_depth	1	17287216	AT1G47128
root_depth	2	18287318	AT2G44200
root_depth	2	18287318	AT2G44210
root_depth	2	18287318	AT2G44220
root_depth	2	18287318	AT2G44230
root_depth	2	18287318	AT2G44240
root_depth	2	18287318	AT2G44250
root_depth	2	18287318	AT2G44255
root_depth	2	18287318	AT2G44260
root_depth	3	6820565	AT3G19600
root_depth	3	6820565	AT3G19610
root_depth	3	6820565	AT3G19615
root_depth	3	6820565	AT3G19620
root_depth	3	6820565	AT3G19630
root_depth	3	6820565	AT3G19640
root_depth	3	6820565	AT3G19650
root_depth	3	6820565	AT3G19660
root_depth	3	6820565	AT3G19663
root_depth	3	6820565	AT3G19670
root_depth	3	6829279	AT3G19630
root_depth	3	6829279	AT3G19640
root_depth	3	6829279	AT3G19650
root_depth	3	6829279	AT3G19660
root_depth	3	6829279	AT3G19663
root_depth	3	6829279	AT3G19670
root_depth	4	8289243	AT4G14370
root_depth	4	8289243	AT4G14380
root_depth	4	8289243	AT4G14385
root_depth	4	8289243	AT4G14390
root_depth	4	8289243	AT4G14400
root_depth	4	8289243	AT4G14403
root_depth	4	8290337	AT4G14370
root_depth	4	8290337	AT4G14380
root_depth	4	8290337	AT4G14385
root_depth	4	8290337	AT4G14390
root_depth	4	8290337	AT4G14400
root_depth	4	8290337	AT4G14403
root_depth	4	8290337	AT4G14410
root_depth	4	8290954	AT4G14370
root_depth	4	8290954	AT4G14380
root_depth	4	8290954	AT4G14385
root_depth	4	8290954	AT4G14390
root_depth	4	8290954	AT4G14400
root_depth	4	8290954	AT4G14403
root_depth	4	8290954	AT4G14410
root_depth	4	8291780	AT4G14370
root_depth	4	8291780	AT4G14380
root_depth	4	8291780	AT4G14385
root_depth	4	8291780	AT4G14390
root_depth	4	8291780	AT4G14400
root_depth	4	8291780	AT4G14403
root_depth	4	8291780	AT4G14410
root_depth	4	8291780	AT4G14415
root_depth	4	9306582	AT4G16500
root_depth	4	9306582	AT4G16510
root_depth	4	9306582	AT4G16515
root_depth	4	9306582	AT4G16520
root_depth	4	9306582	AT4G16530
root_depth	4	9306582	AT4G16540
root_depth	5	1189767	AT5G04260
root_depth	5	1189767	AT5G04267
root_depth	5	1189767	AT5G04270
root_depth	5	1189767	AT5G04275
root_depth	5	1189767	AT5G04280
root_depth	5	1189767	AT5G04290
root_depth	5	17464419	AT5G43430
root_depth	5	17464419	AT5G43440
root_depth	5	17464419	AT5G43450
root_depth	5	17464419	AT5G43455
root_depth	5	17464419	AT5G43460
root_depth	5	17464419	AT5G43470
root_depth	5	17464419	AT5G43480
root_depth	5	17464419	AT5G43490
root_depth	5	17464419	AT5G43500
root_depth	5	17464419	AT5G43510
Convex_Area	5	498858	AT5G02330
Convex_Area	5	498858	AT5G02340
Convex_Area	5	498858	AT5G02350
Convex_Area	5	498858	AT5G02360
Convex_Area	5	498858	AT5G02370
Convex_Area	5	498858	AT5G02380
Convex_Area	5	498858	AT5G02385
Convex_Area	5	498858	AT5G02390
Convex_Area	5	16148052	AT5G40348
Convex_Area	5	16148052	AT5G40350
Convex_Area	5	16148052	AT5G40360
Convex_Area	5	16148052	AT5G40370
Convex_Area	5	16148052	AT5G40380
Convex_Area	5	16148052	AT5G40382
Convex_Area	5	16148052	AT5G40384
Convex_Area	5	16809417	AT5G42000
Convex_Area	5	16809417	AT5G42010
Convex_Area	5	16809417	AT5G42020
Convex_Area	5	16809417	AT5G42030
Convex_Area	5	16809417	AT5G42040
Convex_Area	5	16809417	AT5G42050
Convex_Area	5	16809417	AT5G42053
Convex_Area	5	16809417	AT5G42060
Convex_Area	5	16809417	AT5G42070
Convex_Area	5	19849580	AT5G48940
Convex_Area	5	19849580	AT5G48945
Convex_Area	5	19849580	AT5G48950
Convex_Area	5	19849580	AT5G48953
Convex_Area	5	19849580	AT5G48960
Convex_Area	5	19849580	AT5G48965
Convex_Area	5	19849580	AT5G48970
Convex_Area	5	22761810	AT5G56210
Convex_Area	5	22761810	AT5G56220
Convex_Area	5	22761810	AT5G56230
Convex_Area	5	22761810	AT5G56240
Convex_Area	5	22761810	AT5G56250
Convex_Area	5	24065024	AT5G59700
Convex_Area	5	24065024	AT5G59710
Convex_Area	5	24065024	AT5G59720
Convex_Area	5	24065024	AT5G59730
Convex_Area	5	24065024	AT5G59732
Convex_Area	5	24065024	AT5G59740
Convex_Area	5	24065024	AT5G59750
Projected_Area	4	11858757	AT4G22490
Projected_Area	4	11858757	AT4G22505
Projected_Area	4	11858757	AT4G22513
Projected_Area	4	11858757	AT4G22510
Projected_Area	4	11858757	AT4G22517
Projected_Area	4	11858757	AT4G22520
Projected_Area	4	11858757	AT4G22530
Projected_Area	4	11858757	AT4G22540
Projected_Area	5	1790893	AT5G05930
Projected_Area	5	1790893	AT5G05940
Projected_Area	5	1790893	AT5G05945
Projected_Area	5	1790893	AT5G05950
Projected_Area	5	1790893	AT5G05960
Projected_Area	5	1790893	AT5G05965
Projected_Area	5	1790893	AT5G05970
Projected_Area	5	1790893	AT5G05980
Projected_Area	5	16148052	AT5G40348
Projected_Area	5	16148052	AT5G40350
Projected_Area	5	16148052	AT5G40360
Projected_Area	5	16148052	AT5G40370
Projected_Area	5	16148052	AT5G40380
Projected_Area	5	16148052	AT5G40382
Projected_Area	5	16148052	AT5G40384
Root_biomass	4	11858757	AT4G22490
Root_biomass	4	11858757	AT4G22505
Root_biomass	4	11858757	AT4G22513
Root_biomass	4	11858757	AT4G22517
Root_biomass	4	11858757	AT4G22510
Root_biomass	4	11858757	AT4G22520
Root_biomass	4	11858757	AT4G22530
Root_biomass	4	11858757	AT4G22540
Root_Shoot_ratio	1	16856911	AT1G44382
Root_Shoot_ratio	1	16856911	AT1G44414
Root_Shoot_ratio	1	16856911	AT1G44446
Root_Shoot_ratio	1	16856911	AT1G44478
Root_Shoot_ratio	1	16856911	AT1G44510
Root_Shoot_ratio	1	16856911	AT1G44542
Root_Shoot_ratio	4	6855771	AT4G11240
Root_Shoot_ratio	4	6855771	AT4G11250
Root_Shoot_ratio	4	6855771	AT4G11260
Root_Shoot_ratio	4	6855771	AT4G11270
Root_Shoot_ratio	4	6855771	AT4G11280
Root_Shoot_ratio	4	10450809	AT4G19050
Root_Shoot_ratio	4	10450809	AT4G19060
Root_Shoot_ratio	4	10450809	AT4G19070
Root_Shoot_ratio	4	10450809	AT4G19080
Root_Shoot_ratio	4	10450809	AT4G19090
Root_Shoot_ratio	4	10450809	AT4G19095
Root_Shoot_ratio	4	10450809	AT4G19100
Root_Shoot_ratio	4	10450809	AT4G19110
Root_Shoot_ratio	4	10450809	AT4G19112
Root_Shoot_ratio	4	10450809	AT4G19120
Root_Shoot_ratio	4	10451647	AT4G19050
Root_Shoot_ratio	4	10451647	AT4G19060
Root_Shoot_ratio	4	10451647	AT4G19070
Root_Shoot_ratio	4	10451647	AT4G19080
Root_Shoot_ratio	4	10451647	AT4G19090
Root_Shoot_ratio	4	10451647	AT4G19095
Root_Shoot_ratio	4	10451647	AT4G19100
Root_Shoot_ratio	4	10451647	AT4G19110
Root_Shoot_ratio	4	10451647	AT4G19112
Root_Shoot_ratio	4	10451647	AT4G19120
Root_Shoot_ratio	4	10452508	AT4G19050
Root_Shoot_ratio	4	10452508	AT4G19060
Root_Shoot_ratio	4	10452508	AT4G19070
Root_Shoot_ratio	4	10452508	AT4G19080
Root_Shoot_ratio	4	10452508	AT4G19090
Root_Shoot_ratio	4	10452508	AT4G19095
Root_Shoot_ratio	4	10452508	AT4G19100
Root_Shoot_ratio	4	10452508	AT4G19110
Root_Shoot_ratio	4	10452508	AT4G19112
Root_Shoot_ratio	4	10452508	AT4G19120
Root_Shoot_ratio	4	10453449	AT4G19050
Root_Shoot_ratio	4	10453449	AT4G19060
Root_Shoot_ratio	4	10453449	AT4G19070
Root_Shoot_ratio	4	10453449	AT4G19080
Root_Shoot_ratio	4	10453449	AT4G19090
Root_Shoot_ratio	4	10453449	AT4G19095
Root_Shoot_ratio	4	10453449	AT4G19100
Root_Shoot_ratio	4	10453449	AT4G19110
Root_Shoot_ratio	4	10453449	AT4G19112
Root_Shoot_ratio	4	10453449	AT4G19120
Root_Shoot_ratio	4	10453500	AT4G19050
Root_Shoot_ratio	4	10453500	AT4G19060
Root_Shoot_ratio	4	10453500	AT4G19070
Root_Shoot_ratio	4	10453500	AT4G19080
Root_Shoot_ratio	4	10453500	AT4G19090
Root_Shoot_ratio	4	10453500	AT4G19095
Root_Shoot_ratio	4	10453500	AT4G19100
Root_Shoot_ratio	4	10453500	AT4G19110
Root_Shoot_ratio	4	10453500	AT4G19112
Root_Shoot_ratio	4	10453500	AT4G19120
Root_Shoot_ratio	4	10454047	AT4G19050
Root_Shoot_ratio	4	10454047	AT4G19060
Root_Shoot_ratio	4	10454047	AT4G19070
Root_Shoot_ratio	4	10454047	AT4G19080
Root_Shoot_ratio	4	10454047	AT4G19090
Root_Shoot_ratio	4	10454047	AT4G19095
Root_Shoot_ratio	4	10454047	AT4G19100
Root_Shoot_ratio	4	10454047	AT4G19110
Root_Shoot_ratio	4	10454047	AT4G19112
Root_Shoot_ratio	4	10454047	AT4G19120
Root_Shoot_ratio	4	10455509	AT4G19060
Root_Shoot_ratio	4	10455509	AT4G19070
Root_Shoot_ratio	4	10455509	AT4G19080
Root_Shoot_ratio	4	10455509	AT4G19090
Root_Shoot_ratio	4	10455509	AT4G19095
Root_Shoot_ratio	4	10455509	AT4G19100
Root_Shoot_ratio	4	10455509	AT4G19110
Root_Shoot_ratio	4	10455509	AT4G19112
Root_Shoot_ratio	4	10455509	AT4G19120
Root_Shoot_ratio	4	10878905	AT4G20090
Root_Shoot_ratio	4	10878905	AT4G20095
Root_Shoot_ratio	4	10878905	AT4G20100
Root_Shoot_ratio	4	10878905	AT4G20110
Root_Shoot_ratio	4	10878905	AT4G20130
Root_Shoot_ratio	4	10878905	AT4G20115
Root_Shoot_ratio	4	10878905	AT4G20140
Root_Shoot_ratio	4	10878905	AT4G20150
Root_Shoot_ratio	5	9201335	AT5G26240
Root_Shoot_ratio	5	9201335	AT5G26250
Root_Shoot_ratio	5	9201335	AT5G26260
Root_Shoot_ratio	5	9201335	AT5G26262
Root_Shoot_ratio	5	9201335	AT5G26270
Root_Shoot_ratio	5	9201335	AT5G26280
Root_Shoot_ratio	5	23909964	AT5G59230
Root_Shoot_ratio	5	23909964	AT5G59240
Root_Shoot_ratio	5	23909964	AT5G59250
Root_Shoot_ratio	5	23909964	AT5G59260
Root_Shoot_ratio	5	23909964	AT5G59270
Root_Shoot_ratio	5	23909964	AT5G59280
Root_Shoot_ratio	5	23909964	AT5G59290
Root_Shoot_ratio	5	23909964	AT5G59300
Root_Shoot_ratio	5	26391820	AT5G65950
Root_Shoot_ratio	5	26391820	AT5G65960
Root_Shoot_ratio	5	26391820	AT5G65970
Root_Shoot_ratio	5	26391820	AT5G65980
Root_Shoot_ratio	5	26391820	AT5G65990
Root_Shoot_ratio	5	26391820	AT5G66000
Root_Shoot_ratio	5	26391820	AT5G66005
Root_Shoot_ratio	5	26391820	AT5G66010
Root_Shoot_ratio	5	26391820	AT5G66020
PR_length	3	6820565	AT3G19600
PR_length	3	6820565	AT3G19610
PR_length	3	6820565	AT3G19615
PR_length	3	6820565	AT3G19620
PR_length	3	6820565	AT3G19630
PR_length	3	6820565	AT3G19640
PR_length	3	6820565	AT3G19650
PR_length	3	6820565	AT3G19660
PR_length	3	6820565	AT3G19663
PR_length	3	6820565	AT3G19670
PR_length	3	6829279	AT3G19630
PR_length	3	6829279	AT3G19640
PR_length	3	6829279	AT3G19650
PR_length	3	6829279	AT3G19660
PR_length	3	6829279	AT3G19663
PR_length	3	6829279	AT3G19670
PR_length	4	8289243	AT4G14370
PR_length	4	8289243	AT4G14380
PR_length	4	8289243	AT4G14385
PR_length	4	8289243	AT4G14390
PR_length	4	8289243	AT4G14400
PR_length	4	8289243	AT4G14403
PR_length	4	8290337	AT4G14370
PR_length	4	8290337	AT4G14380
PR_length	4	8290337	AT4G14385
PR_length	4	8290337	AT4G14390
PR_length	4	8290337	AT4G14400
PR_length	4	8290337	AT4G14403
PR_length	4	8290337	AT4G14410
PR_length	4	8290954	AT4G14370
PR_length	4	8290954	AT4G14380
PR_length	4	8290954	AT4G14385
PR_length	4	8290954	AT4G14390
PR_length	4	8290954	AT4G14400
PR_length	4	8290954	AT4G14403
PR_length	4	8290954	AT4G14410
PR_length	4	8291780	AT4G14370
PR_length	4	8291780	AT4G14380
PR_length	4	8291780	AT4G14385
PR_length	4	8291780	AT4G14390
PR_length	4	8291780	AT4G14400
PR_length	4	8291780	AT4G14403
PR_length	4	8291780	AT4G14410
PR_length	4	8291780	AT4G14415
PR_length	4	9306582	AT4G16500
PR_length	4	9306582	AT4G16510
PR_length	4	9306582	AT4G16515
PR_length	4	9306582	AT4G16520
PR_length	4	9306582	AT4G16530
PR_length	4	9306582	AT4G16540
PR_length	4	16775179	AT4G35240
PR_length	4	16775179	AT4G35250
PR_length	4	16775179	AT4G35260
PR_length	4	16775179	AT4G35263
PR_length	4	16775179	AT4G35270
PR_length	5	17464419	AT5G43430
PR_length	5	17464419	AT5G43440
PR_length	5	17464419	AT5G43450
PR_length	5	17464419	AT5G43455
PR_length	5	17464419	AT5G43460
PR_length	5	17464419	AT5G43470
PR_length	5	17464419	AT5G43480
PR_length	5	17464419	AT5G43490
PR_length	5	17464419	AT5G43500
PR_length	5	17464419	AT5G43510
Depth_Width_ratio	1	3809067	AT1G11300
Depth_Width_ratio	1	3809067	AT1G11310
Depth_Width_ratio	1	3809067	AT1G11320
Depth_Width_ratio	1	3809067	AT1G11330
Depth_Width_ratio	1	3809067	AT1G11340
Depth_Width_ratio	1	3809067	AT1G11350
Depth_Width_ratio	1	10363237	AT1G29650
Depth_Width_ratio	1	10363237	AT1G29660
Depth_Width_ratio	3	9160309	AT3G25120
Depth_Width_ratio	3	9160309	AT3G25130
Depth_Width_ratio	3	9160309	AT3G25140
Depth_Width_ratio	3	9160309	AT3G25150
Depth_Width_ratio	3	9160309	AT3G25160
Depth_Width_ratio	3	9160309	AT3G25165
Depth_Width_ratio	3	9160309	AT3G25170
Depth_Width_ratio	3	9160309	AT3G25180
Depth_Width_ratio	5	9205446	AT5G26250
Depth_Width_ratio	5	9205446	AT5G26260
Depth_Width_ratio	5	9205446	AT5G26262
Depth_Width_ratio	5	9205446	AT5G26270
Depth_Width_ratio	5	9205446	AT5G26280
Depth_Width_ratio	5	9205446	AT5G26283
1st order LRS	1	19320561	AT1G51965
1st order LRS	1	19320561	AT1G51960
1st order LRS	1	19320561	AT1G51970
1st order LRS	1	19320561	AT1G51980
1st order LRS	2	16657635	AT2G39880
1st order LRS	2	16657635	AT2G39890
1st order LRS	2	16657635	AT2G39900
1st order LRS	2	16657635	AT2G39910
1st order LRS	2	16657635	AT2G39920
1st order LRS	2	16657635	AT2G39930
1st order LRS	2	19281739	AT2G46910
1st order LRS	2	19281739	AT2G46915
1st order LRS	2	19281739	AT2G46920
1st order LRS	2	19281739	AT2G46930
1st order LRS	2	19281739	AT2G46940
1st order LRS	2	19281739	AT2G46950
1st order LRS	2	19547334	AT2G47640
1st order LRS	2	19547334	AT2G47650
1st order LRS	2	19547334	AT2G47670
1st order LRS	2	19547334	AT2G47680
1st order LRS	2	19547334	AT2G47690
1st order LRS	2	19547334	AT2G47700
1st order LRS	2	19547334	AT2G47710
All LRs	3	1777504	AT3G05920
All LRs	3	1777504	AT3G05930
All LRs	3	1777504	AT3G05935
All LRs	3	1777504	AT3G05936
All LRs	3	1777504	AT3G05937
All LRs	3	1777504	AT3G05940
All LRs	3	1777504	AT3G05950
All LRs	3	1777504	AT3G05960
All LRs	3	1777504	AT3G05970
